# Supplementary material for: High-Grade Tumor Budding Stratifies Early-Stage Cervical Cancer with Recurrence Risk
Source: PLoS One. 2016 Nov 18;11(11):e0166311. doi: 10.1371/journal.pone.0166311 (PMC5115730; doi:10.1371/journal.pone.0166311)
Supplement: S1 File — (XLS) [file pone.0166311.s001.xls]

## Sheet: 出芽数据2016-9-24_1
Cases	Histological tye	Out1/2	Out1/3	Histological grade	Tumor size（CM）	The number of tumor buds/HPF	LVSI	PLNM	Surgical margin	PI	FIGO stage	DFS(months)	OS(months)	Recurrence	Death	Adjuvant therapy
1	1	1	1	2	2	7	0	1	1	1	2	43	43	0	0	1
2	1	1	0	1	3	2	0	1	0	1	2	19	19	0	0	1
3	1	1	1	2	3	7	1	1	0	1	2	7	14	1	1	0
4	1	0	0	2	3	1	1	1	0	1	2	24	24	0	0	1
5	1	1	0	3	2	5	1	1	0	1	2	28	28	0	0	1
6	1	1	0	2	2	1	1	1	0	1	4	32	32	0	0	0
7	1	1	0	1	3	0	1	1	0	1	3	93	93	0	0	1
8	1	1	0	2	2	5	1	1	0	1	4	13	20	1	1	0
9	1	1	1	1	2	2	1	1	0	1	2	14	30	1	1	1
10	1	1	1	1	3	8	1	1	1	0	5	20	20	0	0	1
11	1	0	0	2	1	10	1	1	1	0	4	8	16	1	1	1
12	1	1	0	2	2	0	1	1	1	0	4	19	27	1	1	0
13	1	1	0	3	3	3	0	1	1	0	4	20	30	1	1	1
14	1	1	1	2	3	6	1	1	0	0	4	17	14	0	0	0
15	2	1	0	2	2	7	1	1	0	0	2	10	11	1	0	0
16	1	0	0	2	1	6	0	1	0	0	2	18	18	0	0	1
17	1	1	1	3	2	2	1	1	0	0	2	18	18	0	0	1
18	3	0	0	3	2	3	1	1	0	0	2	19	19	0	0	1
19	1	1	1	2	2	1	0	1	0	0	2	19	19	0	0	1
20	1	1	0	3	2	6	1	1	0	0	2	12	14	1	0	1
21	1	1	0	3	2	5	1	1	0	0	4	14	14	0	0	1
22	1	1	1	2	2	7	1	1	0	0	2	13	13	0	0	1
23	2	1	0	3	2	2	1	1	0	0	2	17	17	0	0	1
24	1	0	0	3	1	7	1	1	0	0	2	19	19	0	0	0
25	1	1	0	2	2	2	1	1	0	0	2	17	17	0	0	1
26	1	0	0	2	2	3	1	1	0	0	2	10	21	1	0	0
27	1	1	0	2	2	2	0	1	0	0	4	17	17	0	0	0
28	1	1	1	3	3	2	0	1	0	0	2	21	21	0	0	1
29	1	1	0	3	1	5	1	1	0	0	2	22	22	0	0	1
30	1	0	0	3	2	4	0	1	0	0	4	20	20	0	0	1
31	1	1	1	2	2	3	1	1	0	0	2	20	20	0	0	1
32	1	0	0	2	1	8	0	1	0	0	2	23	23	0	0	1
33	1	1	0	3	2	5	1	1	0	0	2	23	23	0	0	1
34	2	1	1	3	2	8	0	1	0	0	2	23	23	0	0	1
35	1	1	0	3	3	5	1	1	0	0	3	23	23	0	0	1
36	1	1	1	2	2	6	1	1	0	0	2	23	23	0	0	1
37	1	1	1	2	3	1	1	1	0	0	2	23	23	0	0	0
38	1	1	0	2	1	4	0	1	0	0	2	24	24	0	0	0
39	1	1	1	3	3	5	1	1	0	0	4	12	19	1	1	1
40	1	1	1	3	2	5	1	1	0	0	2	13	22	1	1	0
41	1	0	0	3	2	3	0	1	0	0	2	29	29	0	0	1
42	1	1	0	1	3	2	1	1	0	0	4	28	28	0	0	1
43	1	1	1	1	3	0	1	1	0	0	5	28	28	0	0	1
44	2	1	0	3	2	5	1	1	0	0	2	28	28	0	0	1
45	1	1	0	3	3	4	0	1	0	0	2	29	29	0	0	1
46	1	1	0	2	2	6	1	1	0	0	2	29	29	0	0	1
47	1	0	0	2	2	2	0	1	0	0	3	29	29	0	0	1
48	2	1	0	2	2	2	1	1	0	0	2	30	30	0	0	1
49	1	1	0	2	2	6	0	1	0	0	2	30	30	0	0	1
50	2	1	0	1	2	1	0	1	0	0	2	31	31	0	0	1
51	1	1	1	2	3	7	1	1	0	0	3	33	33	0	0	1
52	1	1	0	2	2	2	0	1	0	0	2	34	34	0	0	0
53	3	1	1	3	2	6	0	1	0	0	4	21	34	1	0	0
54	1	1	0	3	2	5	1	1	0	0	2	27	27	0	0	1
55	1	1	0	3	1	7	0	1	0	0	2	35	35	0	0	0
56	1	0	0	2	2	6	1	1	0	0	4	15	36	1	0	0
57	1	0	0	2	1	5	0	1	0	0	2	37	37	0	0	0
58	1	0	0	2	2	9	1	1	0	0	2	9	20	1	1	1
59	1	1	0	2	2	8	1	1	0	0	2	37	37	1	0	1
60	1	0	0	1	1	5	1	1	0	0	2	39	39	0	0	0
61	1	1	1	3	2	6	0	1	0	0	2	39	39	0	0	1
62	1	0	1	3	2	3	0	1	0	0	2	14	25	1	1	1
63	1	1	0	2	2	8	0	1	0	0	4	19	28	1	1	0
64	1	1	0	2	2	8	1	1	0	0	2	20	30	1	1	1
65	1	1	0	1	2	6	1	1	0	0	2	18	35	1	0	0
66	1	1	0	3	2	3	0	1	0	0	2	43	43	0	0	1
67	1	0	0	3	2	7	1	1	0	0	4	43	43	0	0	1
68	2	0	0	2	2	6	0	1	0	0	2	43	43	0	0	0
69	1	0	0	1	2	5	0	1	0	0	2	18	25	1	1	1
70	1	0	0	2	2	6	1	1	0	0	2	15	30	1	1	0
71	1	1	1	3	3	6	1	1	0	0	3	8	20	1	1	0
72	1	1	1	2	2	7	1	1	0	0	2	11	25	1	1	1
73	1	0	0	2	1	7	1	1	0	0	2	47	47	0	0	1
74	1	0	0	2	2	7	1	1	0	0	2	10	48	1	0	1
75	1	1	1	2	2	9	1	1	0	0	2	36	75	1	0	1
76	1	0	0	3	2	8	1	1	0	0	2	23	30	1	1	1
77	1	1	0	2	2	7	0	1	0	0	2	11	19	1	1	1
78	1	0	0	3	2	7	1	1	0	0	2	40	77	1	0	1
79	1	1	0	3	3	4	1	1	0	0	4	80	80	0	0	1
80	1	1	1	2	3	3	1	1	0	0	3	44	59	1	1	0
81	1	1	1	1	2	11	1	1	0	0	2	36	44	1	1	1
82	3	0	0	3	2	5	0	1	0	0	2	91	91	0	0	1
83	1	1	0	3	2	7	1	1	0	0	2	9	18	1	1	1
84	1	1	0	1	2	2	1	1	0	0	4	57	57	0	0	1
85	1	1	0	3	2	8	1	1	0	0	2	45	49	1	1	1
86	1	1	0	2	2	3	1	1	0	0	3	49	49	0	0	1
87	1	1	0	2	1	2	0	1	0	0	2	50	50	0	0	1
88	1	1	0	2	1	8	1	1	0	0	2	15	24	1	1	1
89	1	1	0	2	1	9	1	1	0	0	2	14	22	1	1	1
90	1	1	1	2	2	5	1	1	0	0	3	39	50	1	1	0
91	1	1	1	2	2	11	1	1	0	0	2	20	29	1	1	1
92	1	0	0	1	2	7	0	1	0	0	2	16	30	1	1	0
93	1	1	0	2	2	3	1	1	0	0	2	66	66	0	0	1
94	3	1	1	3	2	8	0	0	0	1	4	5	14	1	0	1
95	1	1	0	3	2	6	1	0	0	1	2	87	87	0	0	0
96	1	1	1	2	3	1	1	0	0	1	2	15	31	1	1	0
97	1	1	1	2	1	6	0	0	1	0	4	18	18	0	0	1
98	1	1	1	2	2	8	0	0	1	0	2	10	14	1	0	1
99	1	1	0	1	2	7	1	0	1	0	4	9	21	1	0	1
100	1	1	1	2	2	8	0	0	1	0	4	12	23	1	0	1
101	1	0	0	2	1	7	0	0	1	0	2	6	22	1	0	1
102	1	1	0	2	1	5	0	0	1	0	4	24	24	0	0	1
103	1	1	0	3	2	1	0	0	1	0	2	28	28	0	0	1
104	1	1	0	3	2	2	0	0	1	0	2	29	29	0	0	1
105	1	0	0	1	2	3	0	0	1	0	4	37	37	0	0	1
106	1	1	0	2	2	5	1	0	1	0	4	43	43	0	0	1
107	1	1	1	2	2	7	1	0	0	0	1	21	21	0	0	1
108	1	1	1	2	3	4	1	0	0	0	4	19	19	0	0	1
109	1	1	1	2	2	4	1	0	0	0	4	24	24	0	0	1
110	3	1	1	3	2	7	1	0	0	0	2	24	24	0	0	1
111	1	1	1	2	3	0	1	0	0	0	2	35	35	0	0	1
112	1	1	1	3	3	6	1	0	0	0	2	59	75	1	0	0
113	1	1	1	2	3	1	1	0	0	0	2	76	76	0	0	0
114	2	1	1	1	2	0	1	0	0	0	2	97	97	0	0	1
115	1	1	1	2	2	7	1	0	0	0	4	57	57	0	0	0
116	1	1	1	2	3	2	1	0	0	0	3	8	15	1	1	1
117	1	1	1	3	2	6	1	0	0	0	2	51	51	0	0	1
118	1	1	1	2	2	6	1	0	0	0	4	52	52	0	0	1
119	1	1	1	3	2	7	1	0	0	0	4	52	52	0	0	1
120	1	1	1	3	2	5	1	0	0	0	2	52	52	0	0	0
121	1	1	1	3	2	2	1	0	0	0	2	55	55	0	0	0
122	1	1	1	1	3	3	1	0	0	0	2	11	48	1	1	1
123	1	1	1	2	2	2	1	0	0	0	2	60	60	0	0	1
124	1	1	1	2	3	3	1	0	0	0	2	90	90	0	0	1
125	1	1	0	2	2	8	1	0	0	0	2	18	18	0	0	1
126	1	1	0	2	2	4	1	0	0	0	2	19	19	0	0	0
127	1	1	0	2	2	1	1	0	0	0	4	17	17	0	0	0
128	1	1	0	2	2	6	1	0	0	0	2	24	24	0	0	0
129	1	1	0	2	2	7	1	0	0	0	4	24	24	0	0	0
130	3	1	0	3	2	0	1	0	0	0	2	43	43	0	0	1
131	2	1	0	1	2	10	1	0	0	0	2	30	82	1	0	0
132	1	1	0	1	2	3	1	0	0	0	2	35	87	1	0	0
133	1	1	0	3	2	5	1	0	0	0	3	20	30	1	1	1
134	1	1	0	2	2	2	1	0	0	0	2	51	51	0	0	1
135	1	1	0	3	2	2	1	0	0	0	2	65	65	0	0	1
136	1	0	0	2	2	4	1	0	0	0	2	22	22	0	0	1
137	1	0	0	2	2	6	1	0	0	0	2	20	20	0	0	0
138	1	0	0	3	2	6	1	0	0	0	1	22	22	0	0	0
139	1	0	0	2	2	4	1	0	0	0	2	22	22	0	0	0
140	1	0	0	3	2	3	1	0	0	0	2	32	32	0	0	0
141	3	0	0	3	2	2	1	0	0	0	2	36	36	0	0	0
142	1	0	0	2	3	5	1	0	0	0	2	40	40	0	0	1
143	1	0	0	2	2	9	1	0	0	0	2	42	42	0	0	0
144	1	0	0	2	2	7	1	0	0	0	2	16	48	1	0	0
145	1	0	0	2	2	10	1	0	0	0	2	22	36	1	1	1
146	1	0	0	2	2	9	1	0	0	0	2	8	15	1	1	1
147	1	1	1	2	2	7	0	0	0	0	2	37	55	1	0	0
148	1	1	1	2	3	7	0	0	0	0	2	14	14	0	0	1
149	1	1	1	2	2	1	0	0	0	0	5	16	16	0	0	1
150	1	1	1	2	3	4	0	0	0	0	2	16	16	0	0	0
151	1	1	1	3	2	1	0	0	0	0	4	17	17	0	0	0
152	2	1	1	1	2	2	0	0	0	0	2	17	17	0	0	0
153	1	1	1	2	2	6	0	0	0	0	2	18	18	0	0	1
154	1	1	1	1	2	8	0	0	0	0	4	18	18	0	0	1
155	1	1	1	3	2	2	0	0	0	0	2	18	18	0	0	1
156	1	1	1	2	3	4	0	0	0	0	2	19	19	0	0	0
157	1	1	1	3	2	1	0	0	0	0	2	21	21	0	0	0
158	1	1	1	2	2	2	0	0	0	0	2	21	21	0	0	0
159	1	1	1	3	3	3	0	0	0	0	2	17	17	0	0	0
160	1	1	1	3	2	1	0	0	0	0	2	22	22	0	0	0
161	1	1	1	3	2	1	0	0	0	0	2	24	24	0	0	0
162	1	1	1	1	2	0	0	0	0	0	2	24	24	0	0	1
163	2	1	1	3	2	1	0	0	0	0	2	20	20	0	0	0
164	1	1	1	2	2	2	0	0	0	0	2	22	22	0	0	0
165	2	1	1	1	2	1	0	0	0	0	2	24	24	0	0	0
166	1	1	1	2	2	4	0	0	0	0	2	23	23	0	0	0
167	1	1	1	1	3	2	0	0	0	0	2	4	24	1	0	0
168	1	1	1	3	2	8	0	0	0	0	4	24	24	0	0	1
169	1	1	1	1	2	5	0	0	0	0	2	30	30	0	0	1
170	1	1	1	3	2	3	0	0	0	0	2	30	30	0	0	0
171	2	1	1	1	2	1	0	0	0	0	2	31	31	0	0	0
172	1	1	1	2	2	6	0	0	0	0	2	32	32	0	0	0
173	1	1	1	2	2	3	0	0	0	0	4	13	23	1	1	1
174	1	1	1	2	2	8	0	0	0	0	2	33	33	0	0	0
175	1	1	1	2	2	4	0	0	0	0	4	7	33	1	0	0
176	1	1	1	2	2	0	0	0	0	0	2	33	33	0	0	1
177	1	1	1	2	2	1	0	0	0	0	2	34	34	0	0	1
178	1	1	1	2	3	3	0	0	0	0	3	34	34	0	0	1
179	1	1	1	2	2	3	0	0	0	0	4	12	19	1	1	0
180	1	1	1	1	2	2	0	0	0	0	2	35	35	0	0	1
181	1	1	1	2	3	1	0	0	0	0	3	35	35	0	0	0
182	1	1	1	2	2	7	0	0	0	0	2	36	36	0	0	1
183	1	1	1	2	2	6	0	0	0	0	2	37	37	0	0	0
184	2	1	1	1	2	0	0	0	0	0	2	36	36	0	0	0
185	1	1	1	2	2	5	0	0	0	0	2	37	37	0	0	0
186	1	1	1	3	2	2	0	0	0	0	4	37	37	0	0	0
187	1	1	1	3	2	4	0	0	0	0	2	21	29	1	1	0
188	1	1	1	3	2	3	0	0	0	0	2	42	42	0	0	0
189	2	1	1	3	2	7	0	0	0	0	2	43	43	0	0	0
190	1	1	1	2	3	1	0	0	0	0	3	43	43	0	0	0
191	1	1	1	1	2	2	0	0	0	0	2	43	43	0	0	0
192	1	1	1	1	2	1	0	0	0	0	2	44	44	0	0	0
193	1	1	1	2	2	7	0	0	0	0	2	46	46	0	0	1
194	1	1	1	2	2	4	0	0	0	0	2	46	46	0	0	0
195	1	1	1	3	2	5	0	0	0	0	2	46	46	0	0	1
196	1	1	1	1	2	8	0	0	0	0	2	27	47	1	0	0
197	2	1	1	3	2	3	0	0	0	0	2	37	47	1	0	0
198	2	1	1	1	2	5	0	0	0	0	2	82	82	0	0	1
199	1	1	1	3	2	1	0	0	0	0	2	83	83	0	0	1
200	1	1	1	3	3	1	0	0	0	0	2	78	78	0	0	1
201	1	1	1	3	2	1	0	0	0	0	4	88	88	0	0	0
202	2	1	1	3	2	5	0	0	0	0	2	24	81	1	0	0
203	1	1	1	3	2	2	0	0	0	0	2	92	92	0	0	1
204	3	1	1	3	2	8	0	0	0	0	4	85	85	0	0	1
205	1	1	1	3	3	5	0	0	0	0	4	14	25	1	1	0
206	1	1	1	2	2	0	0	0	0	0	2	97	97	0	0	0
207	1	1	1	3	2	3	0	0	0	0	2	45	89	1	0	0
208	1	1	1	3	2	2	0	0	0	0	2	90	90	0	0	1
209	1	1	1	1	2	4	0	0	0	0	2	37	48	1	1	1
210	1	1	1	3	2	0	0	0	0	0	2	90	90	0	0	0
211	1	1	1	3	2	0	0	0	0	0	2	49	49	0	0	0
212	3	1	1	3	2	5	0	0	0	0	2	49	49	0	0	0
213	2	1	1	1	2	5	0	0	0	0	3	49	49	0	0	1
214	1	1	1	2	2	2	0	0	0	0	2	49	49	0	0	1
215	1	1	1	2	2	2	0	0	0	0	2	12	29	1	1	0
216	1	1	1	3	2	2	0	0	0	0	2	49	49	0	0	0
217	2	1	1	3	2	6	0	0	0	0	2	49	49	0	0	0
218	1	1	1	3	2	1	0	0	0	0	2	50	50	0	0	0
219	1	1	1	3	2	9	0	0	0	0	4	50	50	0	0	0
220	1	1	1	3	2	3	0	0	0	0	2	50	50	0	0	0
221	2	1	1	3	2	7	0	0	0	0	2	50	50	0	0	0
222	2	1	1	1	2	3	0	0	0	0	2	51	51	0	0	1
223	3	1	1	3	2	3	0	0	0	0	2	51	51	0	0	0
224	2	1	1	2	2	2	0	0	0	0	2	52	52	0	0	0
225	1	1	1	3	2	4	0	0	0	0	2	52	52	0	0	0
226	1	1	1	2	2	6	0	0	0	0	2	34	52	1	1	1
227	1	1	1	2	2	2	0	0	0	0	4	56	56	0	0	0
228	1	1	1	2	2	2	0	0	0	0	2	39	60	1	0	1
229	1	1	1	1	2	3	0	0	0	0	2	60	60	0	0	0
230	1	1	1	3	2	0	0	0	0	0	2	70	70	0	0	1
231	1	1	1	3	2	0	0	0	0	0	2	70	70	0	0	1
232	1	1	1	3	2	1	0	0	0	0	2	70	70	0	0	0
233	1	1	1	3	2	7	0	0	0	0	2	28	71	1	0	1
234	3	1	1	3	3	9	0	0	0	0	3	15	72	1	0	0
235	1	1	1	2	2	5	0	0	0	0	2	60	60	0	0	0
236	2	1	1	1	3	3	0	0	0	0	2	60	60	0	0	1
237	1	1	1	1	2	5	0	0	0	0	2	60	60	0	0	0
238	1	1	1	3	2	1	0	0	0	0	2	63	63	0	0	1
239	1	1	1	3	2	4	0	0	0	0	2	64	64	0	0	1
240	3	1	1	3	2	8	0	0	0	0	2	24	64	1	0	0
241	1	1	1	1	2	3	0	0	0	0	2	65	65	0	0	0
242	1	1	1	3	2	2	0	0	0	0	2	40	65	1	0	0
243	1	1	1	2	2	3	0	0	0	0	2	67	67	0	0	1
244	1	1	1	3	2	5	0	0	0	0	2	68	68	0	0	1
245	2	1	1	1	2	2	0	0	0	0	2	67	67	0	0	0
246	1	1	1	1	2	5	0	0	0	0	2	73	73	0	0	0
247	1	1	0	1	1	6	1	0	0	0	2	21	21	0	0	0
248	1	1	0	3	1	4	1	0	0	0	2	20	20	0	0	0
249	1	1	0	1	1	1	1	0	0	0	2	15	24	1	1	0
250	1	1	0	2	1	6	1	0	0	0	2	14	37	1	0	0
251	1	1	0	3	1	6	1	0	0	0	2	45	56	1	0	0
252	3	0	0	3	1	6	1	0	0	0	2	16	16	0	0	0
253	1	0	0	2	1	3	1	0	0	0	1	17	17	0	0	0
254	1	0	0	3	1	7	1	0	0	0	2	8	24	1	0	0
255	1	0	0	2	1	9	1	0	0	0	2	10	17	1	1	0
256	1	0	0	3	1	3	1	0	0	0	2	15	18	1	1	0
257	2	0	0	1	1	7	1	0	0	0	4	17	37	1	0	0
258	1	0	0	2	1	6	1	0	0	0	2	39	39	0	0	0
259	1	0	0	2	1	9	1	0	0	0	2	45	85	1	0	0
260	1	0	0	1	1	8	1	0	0	0	2	72	72	0	0	0
261	1	1	1	2	1	3	0	0	0	0	2	17	17	0	0	0
262	1	1	1	2	1	1	0	0	0	0	2	19	19	0	0	1
263	1	1	1	2	1	4	0	0	0	0	1	20	20	0	0	0
264	1	1	1	3	1	6	0	0	0	0	2	23	23	0	0	0
265	1	1	1	3	1	3	0	0	0	0	2	22	22	0	0	0
266	3	1	1	3	1	3	0	0	0	0	2	27	27	0	0	0
267	1	1	1	2	1	2	0	0	0	0	2	12	20	1	1	0
268	1	1	1	2	1	1	0	0	0	0	2	37	37	0	0	0
269	1	1	1	2	1	3	0	0	0	0	2	42	42	0	0	0
270	1	1	1	2	1	2	0	0	0	0	2	43	43	0	0	0
271	1	1	1	2	1	4	0	0	0	0	2	43	43	0	0	0
272	1	1	1	2	1	5	0	0	0	0	2	43	43	0	0	0
273	1	1	1	3	1	5	0	0	0	0	2	48	48	0	0	0
274	1	1	1	2	1	2	0	0	0	0	2	77	77	0	0	0
275	1	1	1	2	1	3	0	0	0	0	2	52	52	0	0	0
276	1	1	1	2	1	2	0	0	0	0	2	67	67	0	0	0
277	2	1	0	2	2	4	0	0	0	0	2	16	16	0	0	0
278	1	1	0	3	2	1	0	0	0	0	2	13	22	1	0	0
279	1	1	0	2	2	2	0	0	0	0	4	22	22	0	0	0
280	3	1	0	3	2	9	0	0	0	0	2	24	24	0	0	0
281	1	1	0	3	2	2	0	0	0	0	2	24	24	0	0	0
282	1	1	0	3	2	2	0	0	0	0	2	24	24	0	0	0
283	1	1	0	2	3	7	0	0	0	0	3	12	15	1	0	0
284	1	1	0	2	3	0	0	0	0	0	5	24	24	0	0	0
285	2	1	0	1	2	3	0	0	0	0	4	24	24	0	0	0
286	1	1	0	2	2	6	0	0	0	0	2	27	27	0	0	0
287	1	1	0	2	2	4	0	0	0	0	2	30	30	0	0	0
288	1	1	0	2	2	5	0	0	0	0	2	31	31	0	0	0
289	1	1	0	3	2	0	0	0	0	0	4	32	32	0	0	0
290	1	1	0	3	3	3	0	0	0	0	3	33	33	0	0	0
291	1	1	0	2	3	3	0	0	0	0	2	34	34	0	0	0
292	1	1	0	3	2	3	0	0	0	0	4	35	35	0	0	0
293	1	1	0	2	2	2	0	0	0	0	4	37	37	0	0	0
294	1	1	0	2	2	4	0	0	0	0	2	37	37	0	0	0
295	1	1	0	1	2	7	0	0	0	0	4	15	36	1	0	0
296	1	1	0	3	2	4	0	0	0	0	2	40	40	0	0	0
297	1	1	0	3	2	6	0	0	0	0	2	40	40	0	0	0
298	1	1	0	1	2	2	0	0	0	0	2	42	42	0	0	0
299	1	1	0	2	2	3	0	0	0	0	2	43	43	0	0	0
300	2	1	0	2	3	5	0	0	0	0	2	36	36	1	0	0
301	1	1	0	1	2	7	0	0	0	0	2	43	43	0	0	0
302	1	1	0	3	2	1	0	0	0	0	2	43	43	0	0	0
303	1	1	0	2	2	5	0	0	0	0	2	47	47	0	0	0
304	1	1	0	2	2	0	0	0	0	0	2	48	48	0	0	0
305	2	1	0	3	2	2	0	0	0	0	2	84	84	0	0	0
306	1	1	0	2	2	3	0	0	0	0	2	77	77	0	0	0
307	2	1	0	1	2	1	0	0	0	0	4	79	79	0	0	0
308	1	1	0	1	2	7	0	0	0	0	2	79	79	0	0	0
309	1	1	0	3	2	5	0	0	0	0	2	97	97	0	0	0
310	1	1	0	3	2	7	0	0	0	0	2	86	86	0	0	0
311	1	1	0	3	3	3	0	0	0	0	2	89	89	0	0	0
312	1	1	0	1	2	6	0	0	0	0	2	89	89	0	0	0
313	1	1	0	2	2	7	0	0	0	0	2	61	89	1	0	0
314	1	1	0	3	3	1	0	0	0	0	3	49	49	0	0	0
315	1	1	0	1	2	2	0	0	0	0	2	50	50	0	0	0
316	1	1	0	2	2	1	0	0	0	0	2	53	53	0	0	0
317	1	1	0	2	2	3	0	0	0	0	2	53	53	0	0	0
318	1	1	0	1	2	3	0	0	0	0	4	21	56	1	0	0
319	1	1	0	2	2	3	0	0	0	0	4	57	57	0	0	0
320	3	1	0	3	2	8	0	0	0	0	2	43	70	1	0	0
321	1	1	0	3	2	1	0	0	0	0	2	60	60	0	0	0
322	1	1	0	3	2	7	0	0	0	0	2	37	57	1	1	0
323	2	1	0	3	2	5	0	0	0	0	2	72	72	0	0	0
324	1	1	0	2	2	4	0	0	0	0	4	52	63	1	0	0
325	2	1	0	1	2	4	0	0	0	0	2	65	65	0	0	0
326	1	1	0	3	2	3	0	0	0	0	2	82	82	0	0	0
327	2	0	0	2	3	4	0	0	0	0	5	14	14	0	0	0
328	2	0	0	1	2	1	0	0	0	0	2	16	16	0	0	0
329	1	0	0	2	2	3	0	0	0	0	2	16	16	0	0	0
330	2	0	0	1	2	1	0	0	0	0	4	16	16	0	0	0
331	1	0	0	2	2	0	0	0	0	0	2	16	16	0	0	0
332	1	0	0	1	2	1	0	0	0	0	4	17	17	0	0	0
333	1	0	0	2	2	0	0	0	0	0	2	17	17	0	0	0
334	1	0	0	3	3	2	0	0	0	0	4	19	19	0	0	0
335	2	0	0	2	2	2	0	0	0	0	2	20	20	0	0	0
336	1	0	0	1	2	1	0	0	0	0	4	20	20	0	0	0
337	2	0	0	1	2	3	0	0	0	0	2	20	20	0	0	0
338	1	0	0	2	2	4	0	0	0	0	2	20	20	0	0	0
339	1	0	0	2	2	1	0	0	0	0	4	22	22	0	0	0
340	1	0	0	2	2	2	0	0	0	0	4	19	19	0	0	0
341	1	0	0	2	2	4	0	0	0	0	2	24	24	0	0	0
342	2	0	0	3	2	2	0	0	0	0	2	24	24	0	0	0
343	1	0	0	3	2	6	0	0	0	0	4	6	21	1	0	0
344	1	0	0	3	2	5	0	0	0	0	2	21	21	0	0	0
345	1	0	0	2	2	4	0	0	0	0	2	21	21	0	0	0
346	2	0	0	1	2	4	0	0	0	0	2	24	24	0	0	0
347	1	0	0	2	2	2	0	0	0	0	2	23	23	0	0	0
348	1	0	0	1	2	4	0	0	0	0	2	23	23	0	0	0
349	1	0	0	2	2	1	0	0	0	0	2	23	23	0	0	0
350	1	0	0	2	2	5	0	0	0	0	2	23	23	0	0	0
351	1	0	0	2	2	2	0	0	0	0	2	28	28	0	0	0
352	2	0	0	2	2	3	0	0	0	0	2	28	28	0	0	0
353	1	0	0	3	2	8	0	0	0	0	2	28	28	0	0	0
354	2	0	0	2	2	6	0	0	0	0	2	10	28	1	1	0
355	3	0	0	3	2	3	0	0	0	0	2	30	30	0	0	0
356	1	0	0	3	2	8	0	0	0	0	2	30	30	0	0	0
357	2	0	0	1	2	0	0	0	0	0	2	30	30	0	0	0
358	1	0	0	1	2	5	0	0	0	0	2	32	32	0	0	0
359	2	0	0	1	2	2	0	0	0	0	2	33	33	0	0	0
360	1	0	0	2	2	1	0	0	0	0	4	33	33	0	0	0
361	1	0	0	2	2	7	0	0	0	0	2	34	34	0	0	0
362	1	0	0	1	2	9	0	0	0	0	2	34	34	0	0	0
363	1	0	0	3	2	8	0	0	0	0	2	35	35	0	0	0
364	1	0	0	2	3	4	0	0	0	0	3	35	35	0	0	0
365	2	0	0	2	2	3	0	0	0	0	2	36	36	0	0	0
366	1	0	0	2	2	2	0	0	0	0	2	37	37	0	0	0
367	1	0	0	2	2	0	0	0	0	0	2	37	37	0	0	0
368	1	0	0	2	2	1	0	0	0	0	4	36	36	0	0	0
369	1	0	0	2	2	7	0	0	0	0	2	26	37	1	0	0
370	1	0	0	3	2	1	0	0	0	0	2	37	37	0	0	0
371	1	0	0	2	2	3	0	0	0	0	2	39	39	0	0	0
372	1	0	0	2	2	3	0	0	0	0	2	40	40	0	0	0
373	1	0	0	1	2	4	0	0	0	0	2	40	40	0	0	0
374	1	0	0	3	2	4	0	0	0	0	2	43	43	0	0	0
375	1	0	0	2	2	4	0	0	0	0	2	43	43	0	0	0
376	2	0	0	2	2	0	0	0	0	0	2	42	42	0	0	0
377	1	0	0	3	2	1	0	0	0	0	2	44	44	0	0	0
378	1	0	0	2	2	1	0	0	0	0	2	43	43	0	0	0
379	1	0	0	2	2	8	0	0	0	0	2	44	44	1	0	0
380	1	0	0	2	2	0	0	0	0	0	2	44	44	0	0	0
381	1	0	0	2	2	0	0	0	0	0	2	44	44	0	0	0
382	1	0	0	3	2	5	0	0	0	0	2	45	45	0	0	0
383	1	0	0	3	2	1	0	0	0	0	2	45	45	0	0	0
384	2	0	0	1	2	4	0	0	0	0	2	46	46	0	0	0
385	1	0	0	3	2	3	0	0	0	0	2	42	83	1	0	0
386	1	0	0	3	2	5	0	0	0	0	2	42	75	1	0	0
387	1	0	0	3	2	1	0	0	0	0	2	75	75	0	0	0
388	1	0	0	3	2	3	0	0	0	0	2	78	78	0	0	0
389	1	0	0	2	2	3	0	0	0	0	2	80	80	0	0	0
390	1	0	0	3	2	1	0	0	0	0	2	84	84	0	0	0
391	1	0	0	2	2	2	0	0	0	0	2	91	91	0	0	0
392	2	0	0	3	2	4	0	0	0	0	2	22	93	1	0	0
393	1	0	0	2	2	1	0	0	0	0	1	97	97	0	0	0
394	1	0	0	3	2	0	0	0	0	0	2	97	97	0	0	0
395	1	0	0	2	2	4	0	0	0	0	2	35	64	1	1	0
396	1	0	0	2	2	0	0	0	0	0	2	87	87	0	0	0
397	1	0	0	2	2	0	0	0	0	0	2	79	79	0	0	0
398	1	0	0	2	2	1	0	0	0	0	2	90	90	0	0	0
399	2	0	0	1	2	3	0	0	0	0	2	90	90	0	0	0
400	1	0	0	3	2	0	0	0	0	0	2	90	90	0	0	0
401	1	0	0	2	2	3	0	0	0	0	2	87	87	0	0	0
402	1	0	0	1	2	3	0	0	0	0	2	87	87	0	0	0
403	1	0	0	2	2	7	0	0	0	0	2	56	56	0	0	0
404	1	0	0	3	2	4	0	0	0	0	2	15	40	1	1	0
405	2	0	0	1	2	0	0	0	0	0	2	49	49	0	0	0
406	2	0	0	2	2	2	0	0	0	0	2	49	49	0	0	0
407	1	0	0	2	2	3	0	0	0	0	2	49	49	0	0	0
408	1	0	0	3	2	7	0	0	0	0	2	50	50	0	0	0
409	1	0	0	2	2	5	0	0	0	0	2	50	50	0	0	0
410	1	0	0	1	2	3	0	0	0	0	2	52	52	0	0	0
411	1	0	0	2	2	2	0	0	0	0	2	55	55	0	0	0
412	1	0	0	3	2	2	0	0	0	0	2	47	47	0	0	0
413	1	0	0	3	2	1	0	0	0	0	2	56	56	0	0	0
414	2	0	0	1	2	1	0	0	0	0	2	56	56	0	0	0
415	1	0	0	3	2	0	0	0	0	0	2	72	72	0	0	0
416	1	0	0	3	2	1	0	0	0	0	2	60	60	0	0	0
417	1	0	0	2	2	2	0	0	0	0	2	12	26	1	1	0
418	1	0	0	1	2	3	0	0	0	0	2	72	72	0	0	0
419	1	0	0	2	2	2	0	0	0	0	2	72	72	0	0	0
420	3	0	0	3	2	0	0	0	0	0	2	65	65	0	0	0
421	1	0	0	2	2	3	0	0	0	0	2	65	65	0	0	0
422	1	1	0	2	1	2	0	0	0	0	2	20	20	0	0	0
423	1	1	0	3	1	2	0	0	0	0	2	22	22	0	0	0
424	1	1	0	3	1	0	0	0	0	0	2	37	37	0	0	0
425	1	1	0	3	1	2	0	0	0	0	1	39	39	0	0	0
426	1	1	0	2	1	1	0	0	0	0	2	53	53	0	0	0
427	1	1	0	3	1	8	0	0	0	0	2	64	64	0	0	0
428	3	0	0	3	1	1	0	0	0	0	2	14	14	0	0	0
429	3	0	0	3	1	1	0	0	0	0	2	14	14	0	0	0
430	1	0	0	2	1	1	0	0	0	0	2	17	17	0	0	0
431	1	0	0	2	1	2	0	0	0	0	1	14	14	0	0	0
432	1	0	0	2	1	2	0	0	0	0	4	14	14	0	0	0
433	1	0	0	2	1	2	0	0	0	0	1	14	14	0	0	0
434	1	0	0	2	1	3	0	0	0	0	2	14	14	0	0	0
435	1	0	0	2	1	1	0	0	0	0	2	14	14	0	0	0
436	2	0	0	2	1	2	0	0	0	0	2	14	14	0	0	0
437	1	0	0	2	1	2	0	0	0	0	2	16	16	0	0	0
438	1	0	0	2	1	2	0	0	0	0	2	16	16	0	0	0
439	1	0	0	2	1	3	0	0	0	0	2	16	16	0	0	0
440	2	0	0	1	1	2	0	0	0	0	2	16	16	0	0	0
441	1	0	0	2	1	1	0	0	0	0	2	17	17	0	0	0
442	1	0	0	2	1	2	0	0	0	0	1	17	17	0	0	0
443	3	0	0	3	1	2	0	0	0	0	1	17	17	0	0	0
444	1	0	0	2	1	1	0	0	0	0	2	17	17	0	0	0
445	1	0	0	2	1	3	0	0	0	0	1	17	17	0	0	0
446	1	0	0	3	1	4	0	0	0	0	2	17	17	0	0	0
447	2	0	0	1	1	4	0	0	0	0	2	18	18	0	0	0
448	1	0	0	2	1	4	0	0	0	0	2	18	18	0	0	0
449	1	0	0	2	1	1	0	0	0	0	1	20	20	0	0	0
450	1	0	0	2	1	4	0	0	0	0	1	20	20	0	0	0
451	1	0	0	2	1	4	0	0	0	0	1	20	20	0	0	0
452	1	0	0	2	1	8	0	0	0	0	4	19	19	0	0	0
453	1	0	0	2	1	2	0	0	0	0	1	20	20	0	0	0
454	1	0	0	1	1	2	0	0	0	0	1	20	20	0	0	0
455	1	0	0	2	1	2	0	0	0	0	2	20	20	0	0	0
456	2	0	0	1	1	0	0	0	0	0	1	20	20	0	0	0
457	1	0	0	1	1	1	0	0	0	0	1	20	20	0	0	0
458	1	0	0	2	1	4	0	0	0	0	1	17	17	0	0	0
459	1	0	0	2	1	2	0	0	0	0	1	20	20	0	0	0
460	1	0	0	1	1	3	0	0	0	0	2	20	20	0	0	0
461	2	0	0	2	1	4	0	0	0	0	2	20	20	0	0	0
462	1	0	0	2	1	4	0	0	0	0	2	20	20	0	0	0
463	1	0	0	2	1	4	0	0	0	0	2	21	21	0	0	0
464	1	0	0	3	1	5	0	0	0	0	2	21	21	0	0	0
465	1	0	0	2	1	2	0	0	0	0	2	21	21	0	0	0
466	1	0	0	3	1	8	0	0	0	0	2	18	18	0	0	0
467	1	0	0	1	1	1	0	0	0	0	1	23	23	0	0	0
468	1	0	0	3	1	7	0	0	0	0	2	21	21	0	0	0
469	1	0	0	2	1	1	0	0	0	0	1	24	24	0	0	0
470	1	0	0	2	1	4	0	0	0	0	1	24	24	0	0	0
471	1	0	0	2	1	1	0	0	0	0	1	24	24	0	0	0
472	1	0	0	2	1	1	0	0	0	0	1	22	22	0	0	0
473	1	0	0	1	1	0	0	0	0	0	1	20	20	0	0	0
474	2	0	0	1	1	1	0	0	0	0	2	20	20	0	0	0
475	1	0	0	2	1	4	0	0	0	0	2	22	22	0	0	0
476	1	0	0	2	1	4	0	0	0	0	4	23	23	0	0	0
477	1	0	0	2	1	4	0	0	0	0	2	24	24	0	0	0
478	1	0	0	1	1	4	0	0	0	0	1	24	24	0	0	0
479	1	0	0	2	1	4	0	0	0	0	2	24	24	0	0	0
480	3	0	0	3	1	1	0	0	0	0	2	24	24	0	0	0
481	1	0	0	2	1	9	0	0	0	0	2	23	23	0	0	0
482	1	0	0	2	1	4	0	0	0	0	1	23	23	0	0	0
483	3	0	0	3	1	2	0	0	0	0	2	23	23	0	0	0
484	1	0	0	2	1	1	0	0	0	0	2	24	24	0	0	0
485	1	0	0	2	1	1	0	0	0	0	1	24	24	0	0	0
486	1	0	0	2	1	0	0	0	0	0	2	24	24	0	0	0
487	1	0	0	1	1	2	0	0	0	0	2	27	27	0	0	0
488	1	0	0	2	1	3	0	0	0	0	2	29	29	0	0	0
489	1	0	0	2	1	4	0	0	0	0	1	28	28	0	0	0
490	2	0	0	2	1	7	0	0	0	0	2	13	27	1	1	0
491	1	0	0	2	1	1	0	0	0	0	2	30	30	0	0	0
492	1	0	0	2	1	4	0	0	0	0	2	28	28	0	0	0
493	1	0	0	2	1	1	0	0	0	0	2	30	30	0	0	0
494	1	0	0	2	1	2	0	0	0	0	2	30	30	0	0	0
495	1	0	0	2	1	3	0	0	0	0	4	30	30	0	0	0
496	1	0	0	1	1	1	0	0	0	0	2	30	30	0	0	0
497	2	0	0	2	1	1	0	0	0	0	2	30	30	0	0	0
498	1	0	0	3	1	7	0	0	0	0	2	30	30	0	0	0
499	1	0	0	2	1	6	0	0	0	0	2	30	30	0	0	0
500	1	0	0	2	1	4	0	0	0	0	2	31	31	0	0	0
501	1	0	0	2	1	6	0	0	0	0	1	31	31	0	0	0
502	1	0	0	2	1	2	0	0	0	0	2	31	31	0	0	0
503	1	0	0	2	1	2	0	0	0	0	2	32	32	0	0	0
504	1	0	0	2	1	6	0	0	0	0	2	33	33	0	0	0
505	1	0	0	2	1	5	0	0	0	0	2	33	33	0	0	0
506	1	0	0	2	1	6	0	0	0	0	1	33	33	0	0	0
507	1	0	0	3	1	3	0	0	0	0	2	34	34	0	0	0
508	1	0	0	2	1	8	0	0	0	0	2	34	34	0	0	0
509	1	0	0	2	1	4	0	0	0	0	2	35	35	0	0	0
510	1	0	0	2	1	1	0	0	0	0	2	35	35	0	0	0
511	1	0	0	2	1	3	0	0	0	0	2	35	35	0	0	0
512	1	0	0	2	1	1	0	0	0	0	1	36	36	0	0	0
513	1	0	0	2	1	5	0	0	0	0	2	37	37	0	0	0
514	2	0	0	1	1	3	0	0	0	0	2	37	37	0	0	0
515	1	0	0	2	1	4	0	0	0	0	4	36	36	0	0	0
516	1	0	0	2	1	2	0	0	0	0	1	36	36	0	0	0
517	1	0	0	2	1	0	0	0	0	0	1	37	37	0	0	0
518	3	0	0	3	1	5	0	0	0	0	2	37	37	0	0	0
519	1	0	0	3	1	2	0	0	0	0	2	37	37	0	0	0
520	1	0	0	2	1	3	0	0	0	0	2	37	37	0	0	0
521	1	0	0	2	1	2	0	0	0	0	1	37	37	0	0	0
522	1	0	0	2	1	3	0	0	0	0	4	37	37	0	0	0
523	1	0	0	2	1	2	0	0	0	0	2	37	37	0	0	0
524	1	0	0	1	1	2	0	0	0	0	2	37	37	0	0	0
525	1	0	0	3	1	2	0	0	0	0	2	37	37	0	0	0
526	1	0	0	2	1	2	0	0	0	0	1	37	37	0	0	0
527	1	0	0	2	1	4	0	0	0	0	2	39	39	0	0	0
528	1	0	0	3	1	0	0	0	0	0	2	39	39	0	0	0
529	1	0	0	2	1	2	0	0	0	0	1	39	39	0	0	0
530	1	0	0	2	1	3	0	0	0	0	2	39	39	0	0	0
531	1	0	0	2	1	4	0	0	0	0	2	39	39	0	0	0
532	1	0	0	3	1	4	0	0	0	0	2	39	39	0	0	0
533	2	0	0	2	1	2	0	0	0	0	2	39	39	0	0	0
534	3	0	0	3	1	10	0	0	0	0	2	40	40	0	0	0
535	1	0	0	2	1	2	0	0	0	0	2	40	40	0	0	0
536	1	0	0	2	1	3	0	0	0	0	2	40	40	0	0	0
537	1	0	0	2	1	5	0	0	0	0	2	40	40	0	0	0
538	1	0	0	2	1	5	0	0	0	0	1	42	42	0	0	0
539	1	0	0	1	1	4	0	0	0	0	1	42	42	0	0	0
540	1	0	0	3	1	6	0	0	0	0	2	43	43	0	0	0
541	1	0	0	2	1	1	0	0	0	0	1	43	43	0	0	0
542	1	0	0	3	1	5	0	0	0	0	1	43	43	0	0	0
543	1	0	0	2	1	0	0	0	0	0	2	42	42	0	0	0
544	1	0	0	2	1	1	0	0	0	0	2	43	43	0	0	0
545	1	0	0	3	1	1	0	0	0	0	2	43	43	0	0	0
546	1	0	0	1	1	1	0	0	0	0	2	43	43	0	0	0
547	1	0	0	2	1	0	0	0	0	0	1	43	43	0	0	0
548	1	0	0	3	1	1	0	0	0	0	2	43	43	0	0	0
549	1	0	0	2	1	2	0	0	0	0	1	43	43	0	0	0
550	1	0	0	3	1	2	0	0	0	0	2	43	43	0	0	0
551	1	0	0	2	1	0	0	0	0	0	2	43	43	0	0	0
552	1	0	0	2	1	3	0	0	0	0	1	43	43	0	0	0
553	3	0	0	3	1	3	0	0	0	0	2	43	43	0	0	0
554	1	0	0	2	1	2	0	0	0	0	4	45	45	0	0	0
555	1	0	0	2	1	0	0	0	0	0	2	46	46	0	0	0
556	2	0	0	1	1	1	0	0	0	0	2	46	46	0	0	0
557	1	0	0	2	1	1	0	0	0	0	1	46	46	0	0	0
558	1	0	0	2	1	5	0	0	0	0	2	46	46	0	0	0
559	1	0	0	3	1	2	0	0	0	0	2	47	47	0	0	0
560	1	0	0	2	1	6	0	0	0	0	2	47	47	0	0	0
561	1	0	0	2	1	4	0	0	0	0	2	47	47	0	0	0
562	1	0	0	2	1	3	0	0	0	0	2	48	48	0	0	0
563	2	0	0	1	1	2	0	0	0	0	2	48	48	0	0	0
564	2	0	0	1	1	1	0	0	0	0	2	84	84	0	0	0
565	1	0	0	2	1	1	0	0	0	0	2	82	82	0	0	0
566	1	0	0	3	1	10	0	0	0	0	2	7	11	1	1	0
567	2	0	0	1	1	2	0	0	0	0	2	82	82	0	0	0
568	1	0	0	1	1	2	0	0	0	0	2	84	84	0	0	0
569	1	0	0	3	1	2	0	0	0	0	1	75	75	0	0	0
570	2	0	0	3	1	1	0	0	0	0	2	75	75	0	0	0
571	1	0	0	2	1	1	0	0	0	0	2	75	75	0	0	0
572	1	0	0	3	1	2	0	0	0	0	2	75	75	0	0	0
573	1	0	0	3	1	3	0	0	0	0	2	75	75	0	0	0
574	2	0	0	1	1	2	0	0	0	0	2	22	30	1	1	0
575	1	0	0	3	1	0	0	0	0	0	2	75	75	0	0	0
576	1	0	0	3	1	7	0	0	0	0	2	77	77	0	0	0
577	1	0	0	2	1	3	0	0	0	0	2	77	77	0	0	0
578	1	0	0	2	1	2	0	0	0	0	2	77	77	0	0	0
579	2	0	0	2	1	0	0	0	0	0	2	83	83	0	0	0
580	1	0	0	2	1	3	0	0	0	0	2	77	77	0	0	0
581	1	0	0	3	1	2	0	0	0	0	2	78	78	0	0	0
582	1	0	0	2	1	0	0	0	0	0	4	78	78	0	0	0
583	2	0	0	1	1	0	0	0	0	0	2	79	79	0	0	0
584	2	0	0	1	1	0	0	0	0	0	2	80	80	0	0	0
585	1	0	0	2	1	2	0	0	0	0	2	81	81	0	0	0
586	1	0	0	1	1	2	0	0	0	0	1	81	81	0	0	0
587	1	0	0	2	1	1	0	0	0	0	1	84	84	0	0	0
588	1	0	0	2	1	0	0	0	0	0	2	84	84	0	0	0
589	1	0	0	1	1	1	0	0	0	0	1	90	90	0	0	0
590	1	0	0	3	2	0	0	0	0	0	2	93	93	0	0	0
591	1	0	0	1	1	2	0	0	0	0	2	95	95	0	0	0
592	2	0	0	1	1	2	0	0	0	0	1	96	96	0	0	0
593	1	0	0	2	1	0	0	0	0	0	2	97	97	0	0	0
594	1	0	0	2	1	1	0	0	0	0	2	86	86	0	0	0
595	1	0	0	1	1	0	0	0	0	0	2	87	87	0	0	0
596	2	0	0	1	1	0	0	0	0	0	2	86	86	0	0	0
597	1	0	0	1	1	6	0	0	0	0	2	89	89	0	0	0
598	3	0	0	3	1	0	0	0	0	0	1	90	90	0	0	0
599	1	0	0	1	1	2	0	0	0	0	2	57	57	0	0	0
600	1	0	0	1	1	3	0	0	0	0	2	57	57	0	0	0
601	1	0	0	3	1	5	0	0	0	0	2	49	49	0	0	0
602	1	0	0	1	1	0	0	0	0	0	1	49	49	0	0	0
603	2	0	0	1	1	1	0	0	0	0	2	49	49	0	0	0
604	2	0	0	2	1	1	0	0	0	0	2	49	49	0	0	0
605	1	0	0	2	1	2	0	0	0	0	2	50	50	0	0	0
606	1	0	0	1	1	4	0	0	0	0	2	50	50	0	0	0
607	2	0	0	1	1	6	0	0	0	0	2	50	50	0	0	0
608	1	0	0	2	1	3	0	0	0	0	1	6	50	1	0	0
609	1	0	0	1	1	2	0	0	0	0	1	51	51	0	0	0
610	1	0	0	2	1	9	0	0	0	0	2	40	51	1	0	0
611	1	0	0	1	1	2	0	0	0	0	4	51	51	0	0	0
612	1	0	0	2	1	1	0	0	0	0	1	52	52	0	0	0
613	2	0	0	1	1	1	0	0	0	0	2	52	52	0	0	0
614	1	0	0	2	1	2	0	0	0	0	1	52	52	0	0	0
615	1	0	0	2	1	3	0	0	0	0	1	52	52	0	0	0
616	3	0	0	3	1	3	0	0	0	0	1	53	53	0	0	0
617	1	0	0	1	1	2	0	0	0	0	2	51	51	0	0	0
618	1	0	0	3	1	3	0	0	0	0	2	54	54	0	0	0
619	2	0	0	1	1	3	0	0	0	0	2	54	54	0	0	0
620	1	0	0	3	1	1	0	0	0	0	2	53	53	0	0	0
621	1	0	0	2	1	4	0	0	0	0	2	60	60	0	0	0
622	1	0	0	3	1	1	0	0	0	0	2	70	70	0	0	0
623	1	0	0	2	1	1	0	0	0	0	2	70	70	0	0	0
624	2	0	0	1	1	3	0	0	0	0	2	28	36	1	1	0
625	1	0	0	1	1	1	0	0	0	0	2	4	60	1	0	0
626	1	0	0	1	1	3	0	0	0	0	2	72	72	0	0	0
627	1	0	0	2	1	2	0	0	0	0	2	72	72	0	0	0
628	1	0	0	2	1	3	0	0	0	0	2	72	72	0	0	0
629	2	0	0	1	1	2	0	0	0	0	2	63	63	0	0	0
630	2	0	0	1	1	2	0	0	0	0	1	72	72	0	0	0
631	1	0	0	2	1	0	0	0	0	0	2	60	60	0	0	0
632	1	0	0	1	1	0	0	0	0	0	2	65	65	0	0	0
633	1	0	0	2	1	3	0	0	0	0	2	65	65	0	0	0
634	1	0	0	1	1	1	0	0	0	0	2	66	66	0	0	0
635	1	0	0	3	1	1	0	0	0	0	2	66	66	0	0	0
636	2	0	0	1	1	8	0	0	0	0	2	37	66	1	0	0
637	1	0	0	2	1	3	0	0	0	0	2	15	20	1	1	0
638	1	0	0	2	1	2	0	0	0	0	2	66	66	0	0	0
639	1	0	0	3	1	4	0	0	0	0	2	18	67	1	0	0
640	1	0	0	1	1	3	0	0	0	0	2	67	67	0	0	0
641	1	0	0	1	1	3	0	0	0	0	2	73	76	0	0	0
642	1	0	0	1	1	2	0	0	0	0	2	68	68	0	0	0
643	1	0	0	3	1	0	0	0	0	0	2	70	70	0	0	0
	1=Squamous cell cancer 2=Adenocarcinoma 3=Others	OUT1/2 =stromal invasion of the outer half of the cervical wall 1 = Yes 0 = No	OUT1/3 =stromal invasion of the outer third of the cervical wall 1 = Yes 0 = No	1 = well differentiated 2= moderately differentiated 3= poorly differntiated	1= < 2 2= ≥ 2 and < 4 3= ≥ 4		LVSI = lymphovascular space invasion 1 = positive 0 = negativ	PLNM = pelvic lymph node metastasis 1 = positive 0 = negativ	1 = positive 0 = negativ	PI = Parametrium involvement 1 = positive 0 = negativ	1 = IA2 2 = IB1 3 = IB2 4 = IIA1 5 = IIA2	DFS = disease-free survival	OS = overall survival	1 = Yes 0 = No	1 = Yes 0 = No	1 = Yes 0 = No
